# Supplementary material for: Genetic Basis of a Cognitive Complexity Metric
Source: PLOS journal article supplement (doi:10.1371/journal.pone.0123886), 2015-04-10
Supplement: S5 (10.1371/journal.pone.0123886.s005) [file journal.pone.0123886.s005]

**Table S2.** Results for Assumption Testing and Sex and Age Effects.

| Analyses            | Details                                                                                                                                                                                                                                                                                                                                                                                                                                                                                                                                                                                                                                                                                                                                                                                                                                                                                                                                                                                                                                                                                                                                                                                                                                                                |
|---------------------|------------------------------------------------------------------------------------------------------------------------------------------------------------------------------------------------------------------------------------------------------------------------------------------------------------------------------------------------------------------------------------------------------------------------------------------------------------------------------------------------------------------------------------------------------------------------------------------------------------------------------------------------------------------------------------------------------------------------------------------------------------------------------------------------------------------------------------------------------------------------------------------------------------------------------------------------------------------------------------------------------------------------------------------------------------------------------------------------------------------------------------------------------------------------------------------------------------------------------------------------------------------------|
| Assumption Testing  | No birth order or zygosity effects were found for any measure for means or variances ( $\Delta\chi^2_4$ ranged 0.4-4.1 for birth order, $\Delta\chi^2_2$ ranged 0.04-1.5 for zygosity), with the exception of a variance difference for zygosity found for Reasoning ( $\Delta\chi^2_2 = 8.6$ ), where female DZ pairs had low variability (0.66-0.69) compared to male and female MZ pairs and male DZ pairs (0.91-1.00). As a consistent zygosity effect across both males and females was not found, variances for female MZ and DZ pairs were set to be equal. Means and variances for non-twin siblings could be set equal to those of twins for all measures except the Sentence and N-term Tasks, where for males only, non-twin siblings had higher means than twins (18.2 vs 16.8, $\Delta\chi^2_2 = 8.1$ and 13.3 vs 12.0, $\Delta\chi^2_2 = 10.4$ respectively). Means for these measures were left free to vary between non-twin siblings and twins in further analyses. The differences found may reflect a sampling issue due to the small number of males in the non-twin sibling group (33 males vs. 67 females - note that 3 <sup>rd</sup> born DZ triplets are grouped with non-twin siblings in analyses, as the genetic relationship is the same). |
| Sex and Age Effects | Means and variances could be set equal for males and females for all measures except IQ and Reasoning, where means differed significantly ( $\Delta\chi^2_1 = 22.2$ and 12.6 respectively). On average, males had higher IQ scores than females ( $M = 113.9$ vs. 108.7) and higher Reasoning scores (factor z-score $M = 0.14$ vs. -0.11). Consequently, sex was included as a covariate in further analyses. No effects for age were found ( $\Delta\chi^2_1$ ranged 0.1-2.4).                                                                                                                                                                                                                                                                                                                                                                                                                                                                                                                                                                                                                                                                                                                                                                                       |
